# Supplementary material
Source: publisher figshare collection journal article supplement (https://geolsoc.figshare.com/ndownloader/files/28832365)
Supplement: Supplementary file 1 [file 28832365]

## Sheet: Supplementary Materials 2
Supplementary material 2. Microthermometric results of type-6 fluid inclusions from the Patterson Lake corridor.
Occurrence	Sz (µ)	Tm-CO2 (°C)	Th-CO2 (°C)	Tm-cla (°C)	Th (°C)
MR-18-Ar-05 (DDH Ar-15-57-C5, 817.1 m, Q2, Basement)
Chip1
Inter-HF1 (intercrystal healed fracture)	5	–	30.4	–	30.4
	10	-57.5	28	–	28
Inter-HF1 (intercrystal healed fracture)	7	-57.4	26.7	–	26.7
	4	-58.5	26.4	–	26.4
	5	-57.7	26.3	–	26.3
	9	-58.5	25	–	25
	6	-57.6	26.4	–	26.4
	4	-57.6	25.5	–	25.5
MR-18-CW-05 (DDH CW-002, 210.5 m, Q3, Basement)
Chip1
Inter-HF1 (intercrystal healed fracture)	12	–	–	–	>360
	10	-56.7	23.1	8	248
	9	-56.6	26.4	8.1	>360
Inter-HF2 (intercrystal healed fracture)	10	-56.5	24.1	–	24.1
	8	-57.4	22.1	–	22.1
	7	-57.2	23.8	–	23.8
	5	-57.1	22.2	–	22.2
	6	-56.9	22.4	–	22.4
*Sz – size; V (%) – vapor percentage; Tm-CO2 – Melting temperature of CO2; Th-CO2 – Homogenization temperature of CO2; Tm-cla – Melting temperature of CO2 clathrate; Th – Total homogenization temperature
